# Supplementary material
Source: PubMed Central journal article supplement (PMC2453226)

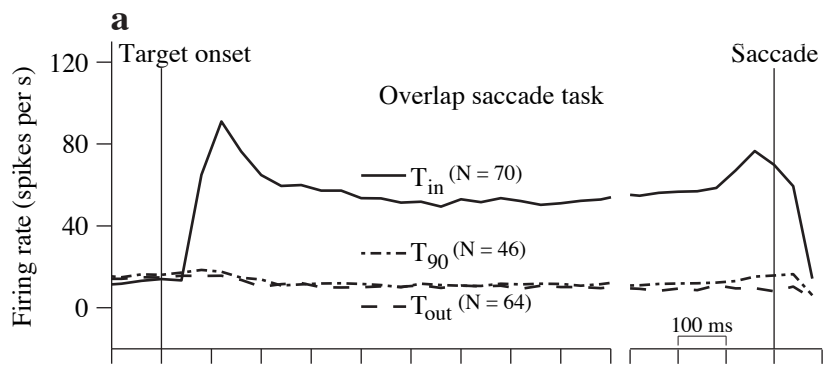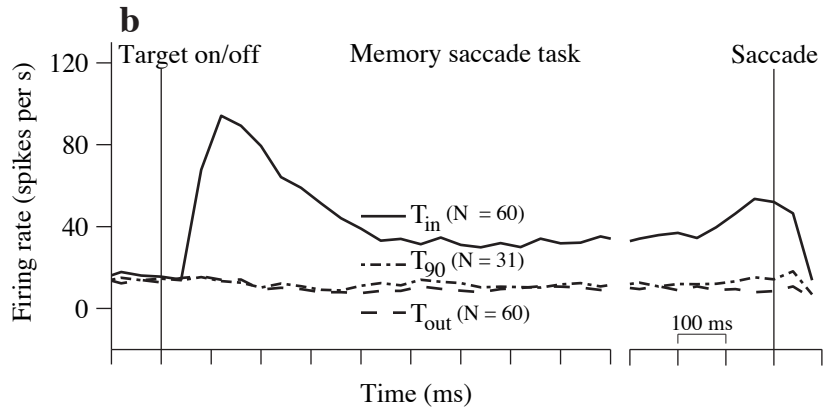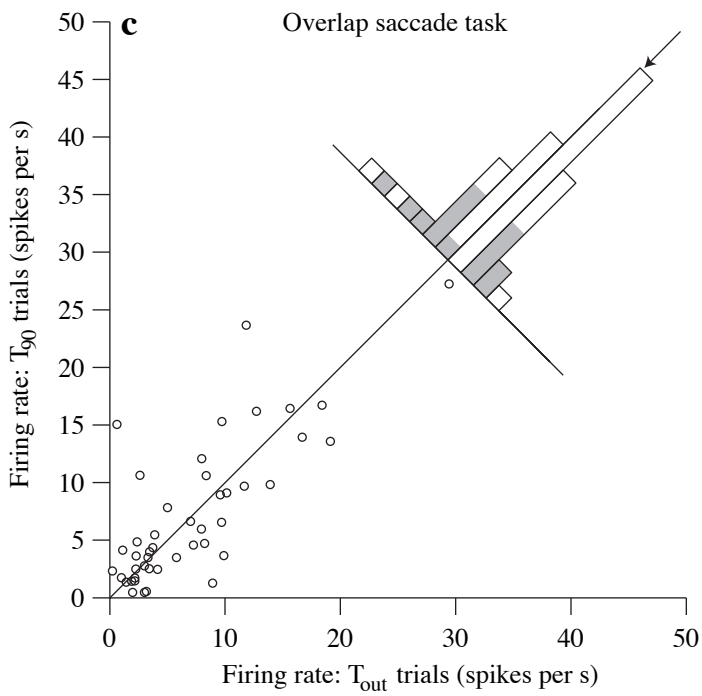

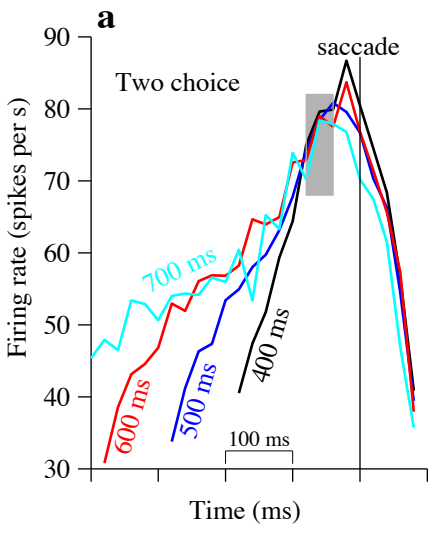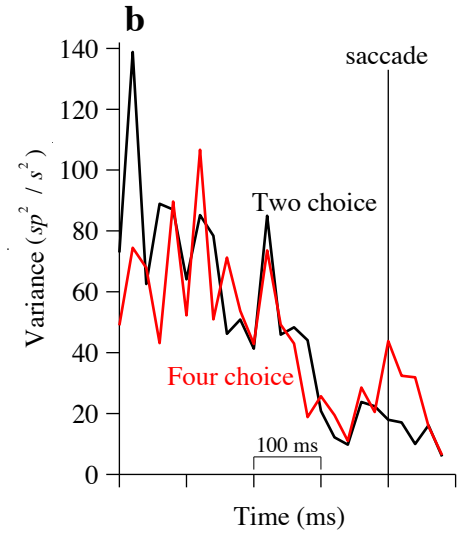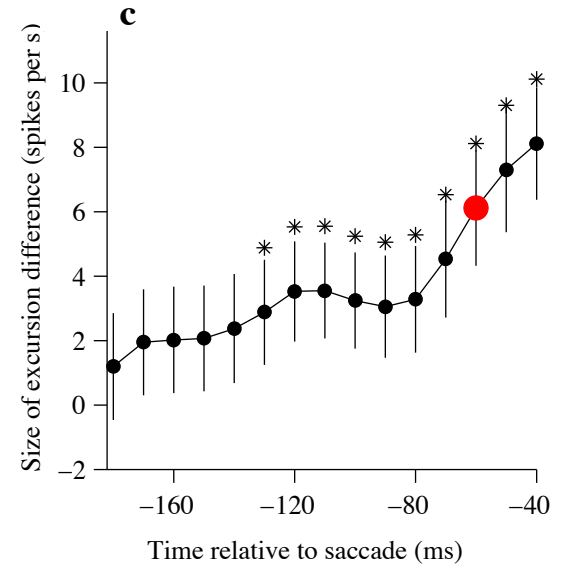

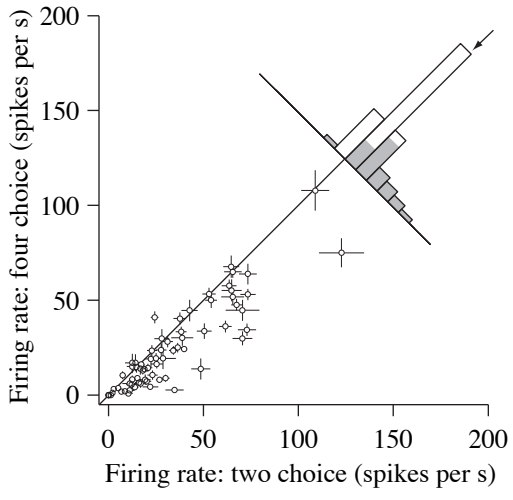

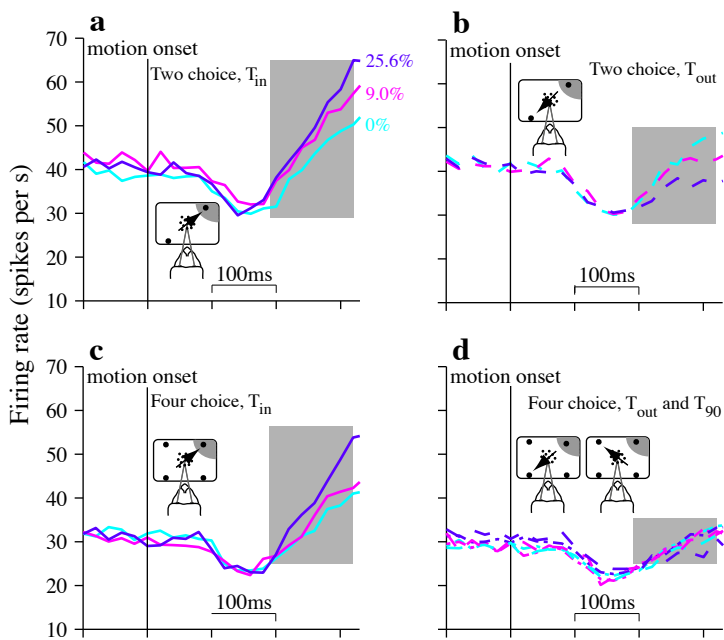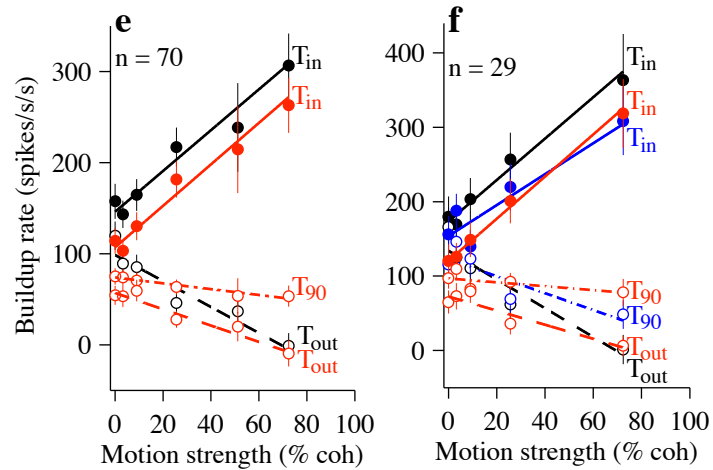

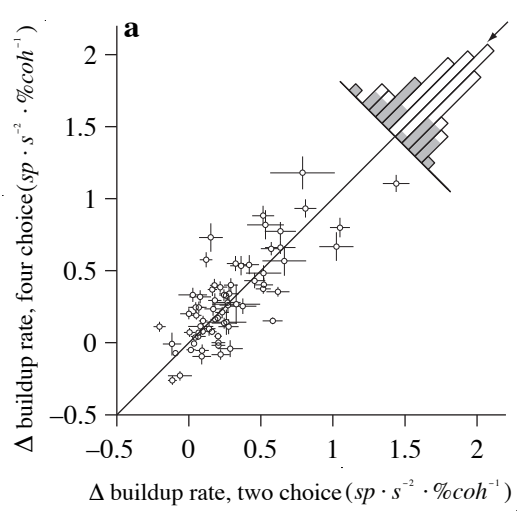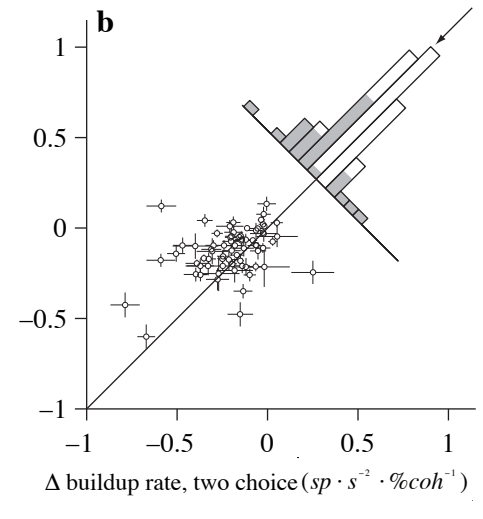

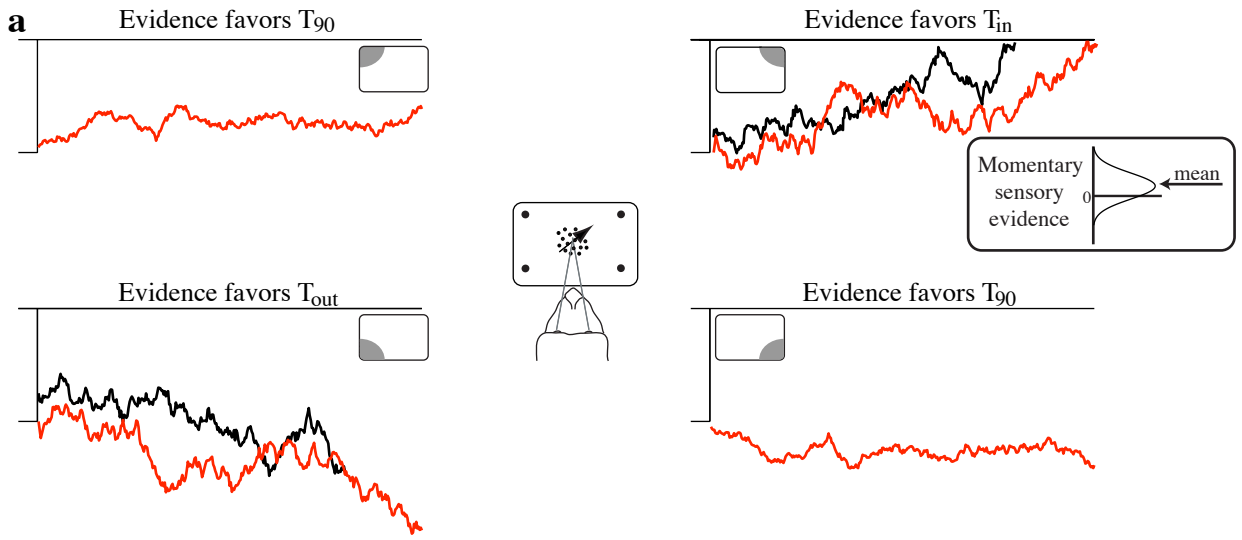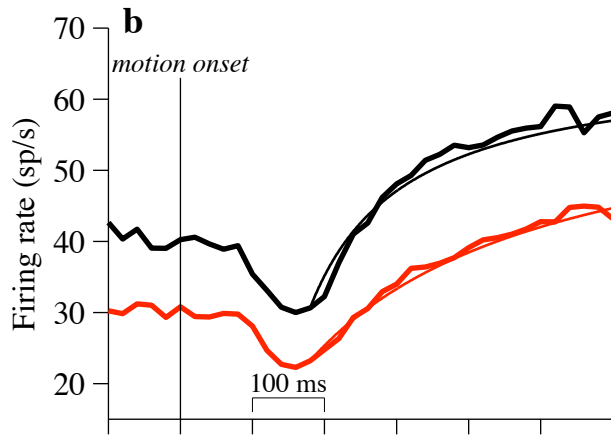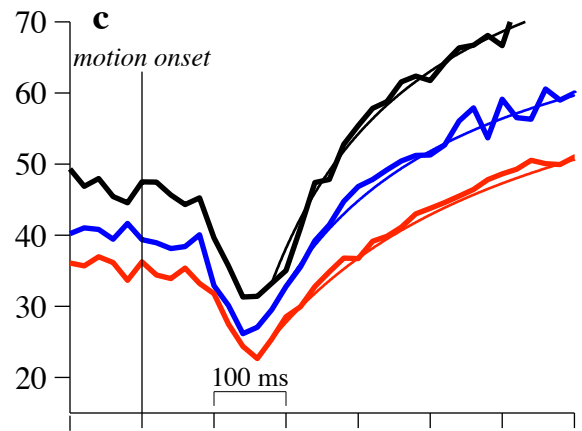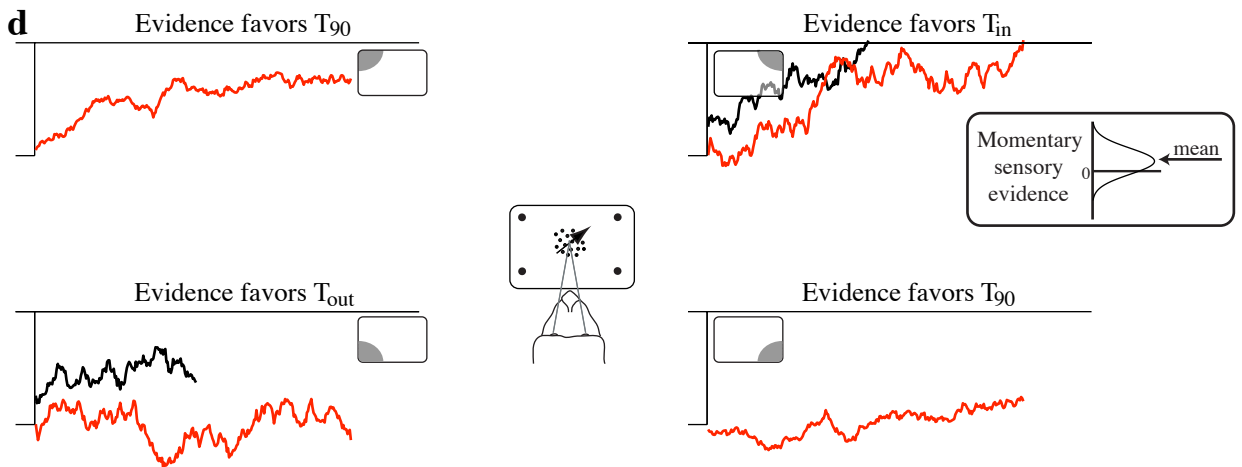

**a** Two choice

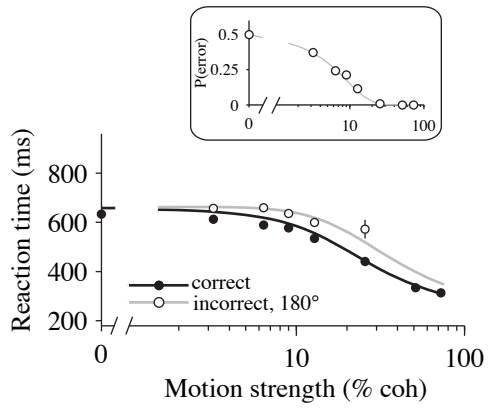

**b** Four choice

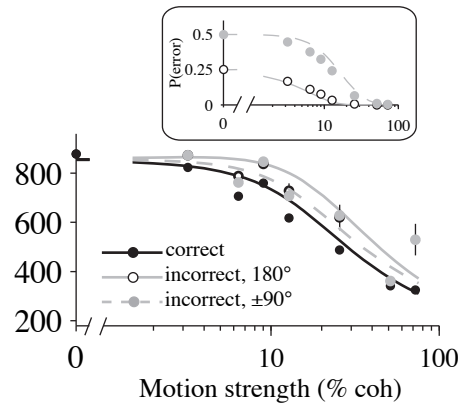

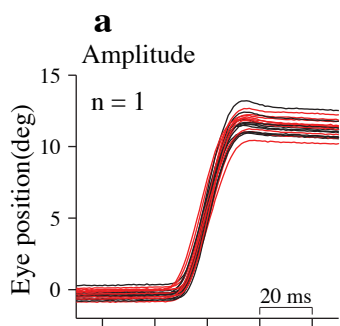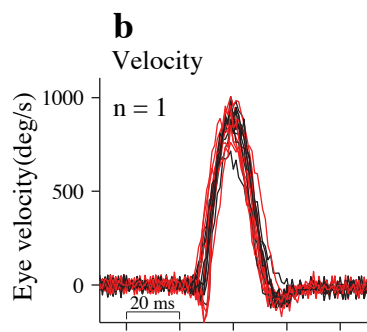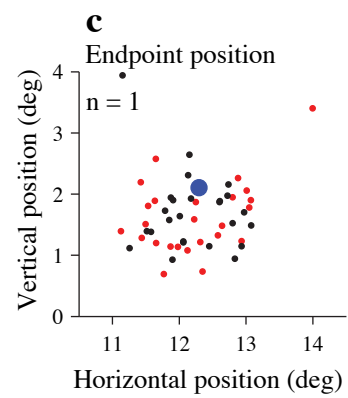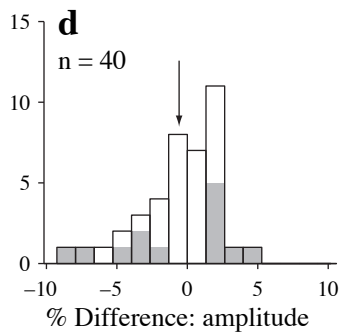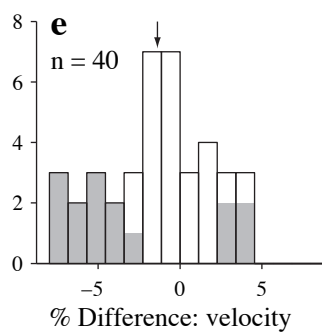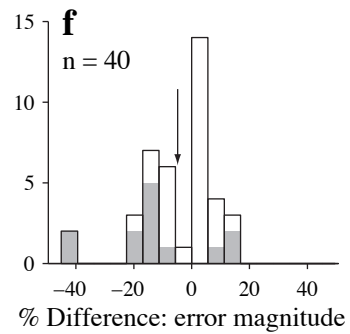

Supplement: NIHMS47050-supplement-supp_data.pdf [file NIHMS47050-supplement-supp_data.pdf]
